# Supplementary material for: Comparative phylogenetic analysis and transcriptional profiling of MADS-box gene family identified DAM and FLC-like genes in apple (Malusx domestica)
Source: PubMed Central journal article supplement (PMC4746589; doi:10.1038/srep20695), 2016-02-09
Supplement: srep20695-s1.pdf [file srep20695-s1.pdf]

**Supplementary Information:**

**Comparative phylogenetic analysis and transcriptional profiling of MADS-box gene family identified *DAM* and *FLC*-like genes in apple (*Malus x domestica*)**

Gulshan Kumar<sup>1,2,†</sup>, Preeti Arya<sup>1,2,†</sup>, Khushboo Gupta<sup>1</sup>, Vinay Randhawa<sup>1,2</sup>, Vishal Acharya<sup>1,2</sup>,  
Anil Kumar Singh<sup>1,2,\*</sup>

<sup>1</sup>Department of Biotechnology, CSIR-Institute of Himalayan Bioresource Technology, Palampur-176 061 (HP), India, <sup>2</sup>Academy of Scientific and Innovative Research, New Delhi, India

<sup>†</sup> These authors contribute equally to this work

\*Correspondence and request for material should be addressed to AKS: ([anil@ihbt.res.in](mailto:anil@ihbt.res.in); [anils13@gmail.com](mailto:anils13@gmail.com))

## Supplementary Information

**Supplementary Figure S1.** Chromosomal location and clustering of 142 MADS-box genes identified in apple. The chromosome number is indicated on the top of each chromosome. The color code represents the MdMADS belonging to different sub-families. The box indicates the 29 gene clusters on 17 apple chromosomes.

**Supplementary Figure S2.** Tandem and segmental duplication events in *MdMADS-box* gene family.

**Supplementary Figure S3.** Collinear genes pairs of *MdMADS-box* genes on all 17 apple chromosomes. Red lines indicate segmental duplication of *MdMADS-box* on 17 apple chromosomes, and grey lines represent collinear segments other than *MdMADS-box* genes.

**Supplementary Figure S4.** Phylogenetic tree of SVP orthologs of apple and other eudicots (Arabidopsis, peach, poplar, cucumber and grape).

**Supplementary Figure S5.** Relative expression of various MdMADS genes based upon FPKM based expression value and validated by quantitative reverse transcriptase-polymerase chain reaction (qRT-PCR). Pearson correlation coefficient between fold change FPKM and qRT-PCR was 0.34 (p-value=0.0005)

**Supplementary Figure S6.** Degree distributions of reproductive and vegetative phase network. The scatter plots show proteins (x-axis) versus the probability of a protein having  $k$  connections (y-axis). The reproductive phase network indicates scale-free nature.

**Supplementary Table S1.** List of MdMADS, their annotation and orthologs in Arabidopsis.

**Supplementary Table S2.** Comparison of MdMADS identified in present study with that of MdMADS identified by Tian et al. (2015).

**Supplementary Table S3.** The sample abbreviation and their collection intervals.

**Supplementary Table S4.** List of low temperature responsive elements in 1.5Kb upstream promoter regions of MdDAMs.

**Supplementary Table S5.** List of DNA binding site sequence for MdMADS proteins identified in apple.

**Supplementary Table S6.** List of hub proteins and their interacting partners in Arabidopsis identified through protein-protein interaction network and their orthologs in apple.

**Supplementary Table S7.** Over-represented biological process and molecular function gene ontology terms associated with reproductive phase network proteins.

**Supplementary Table S8.** List of primer sequence of randomly selected 10 MdMADS genes.

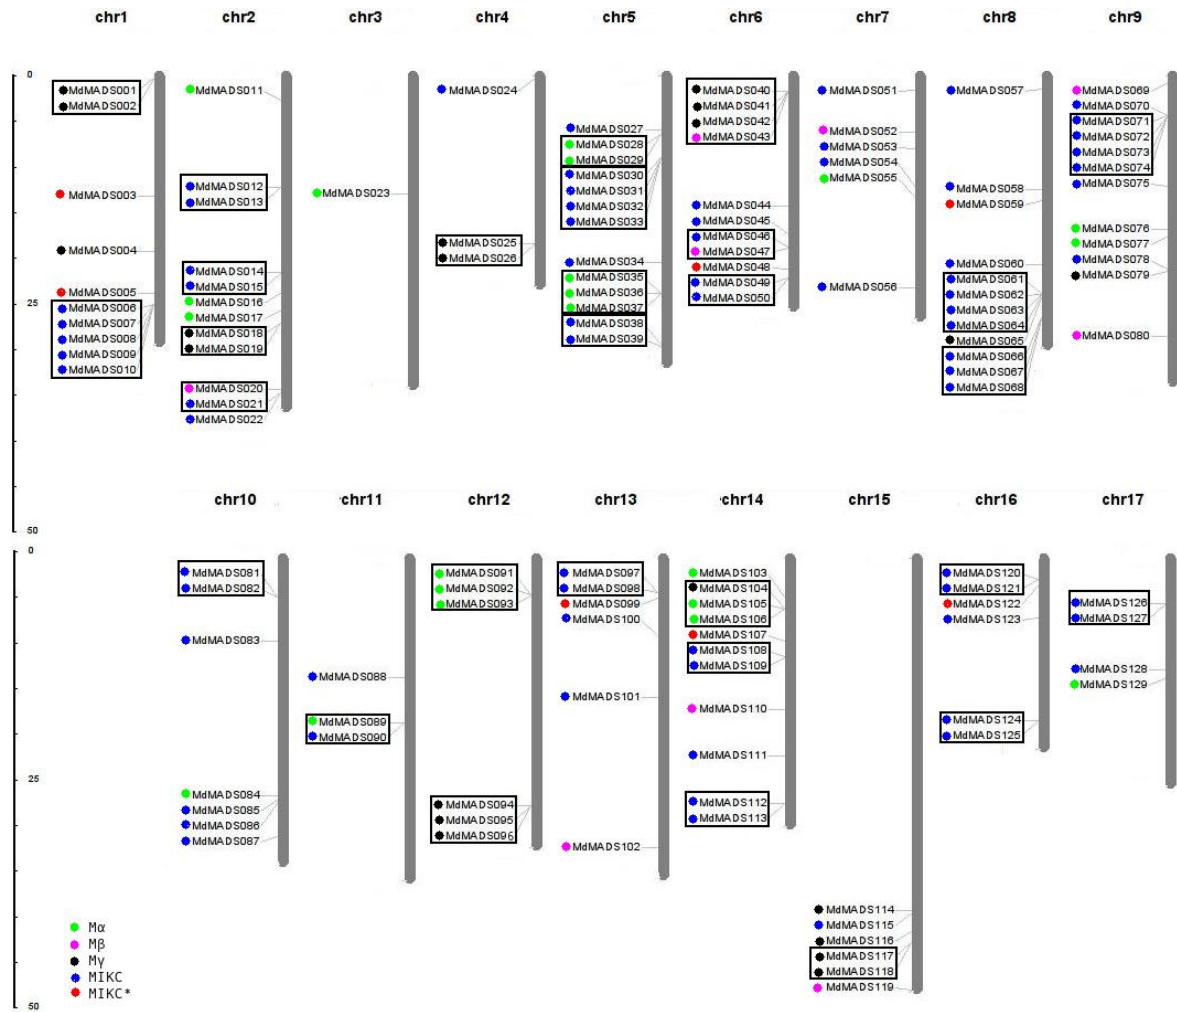

**Supplementary Figure S1.** Chromosomal location and clustering of 142 MADS-box genes identified in apple. The chromosome number is indicated on the top of each chromosome. The color code represents the MmMADS belonging to different sub-families. The box indicates the 29 gene clusters on 17 apple chromosomes.

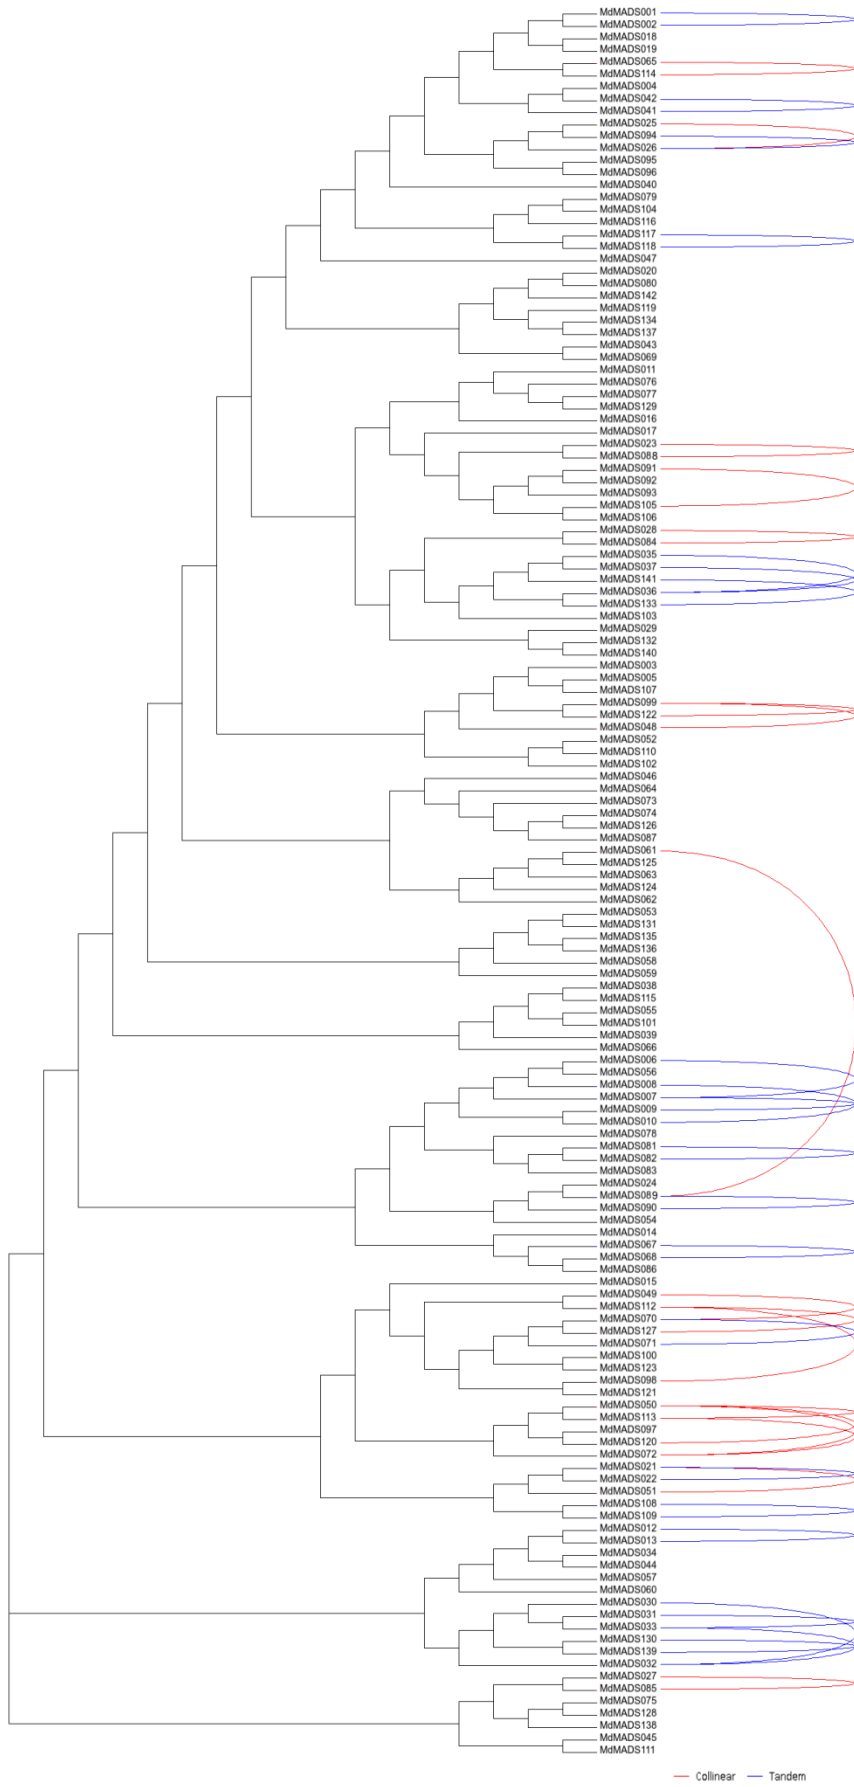

**Supplementary Figure S2.** Tandem and segmental duplication events in *MdMADS-box* gene family.

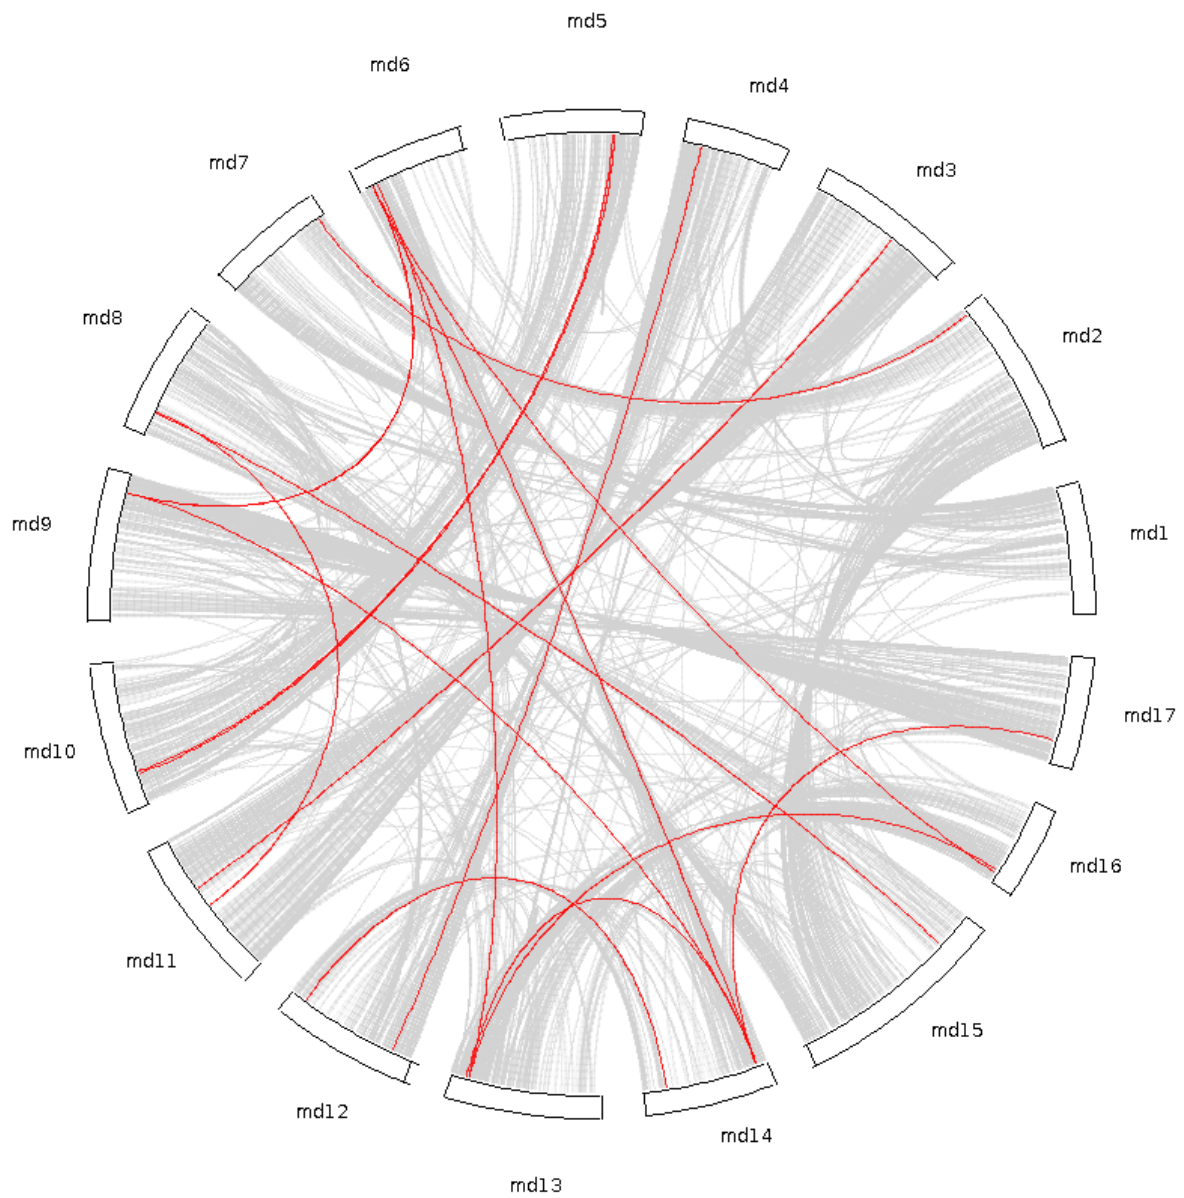

**Supplementary Figure S3.** Collinear genes pairs of *MdMADS-box* genes on all 17 apple chromosomes. Red lines indicate segmental duplication of *MdMADS-box* on 17 apple chromosomes, and grey lines represent collinear segments other than *MdMADS-box* genes.

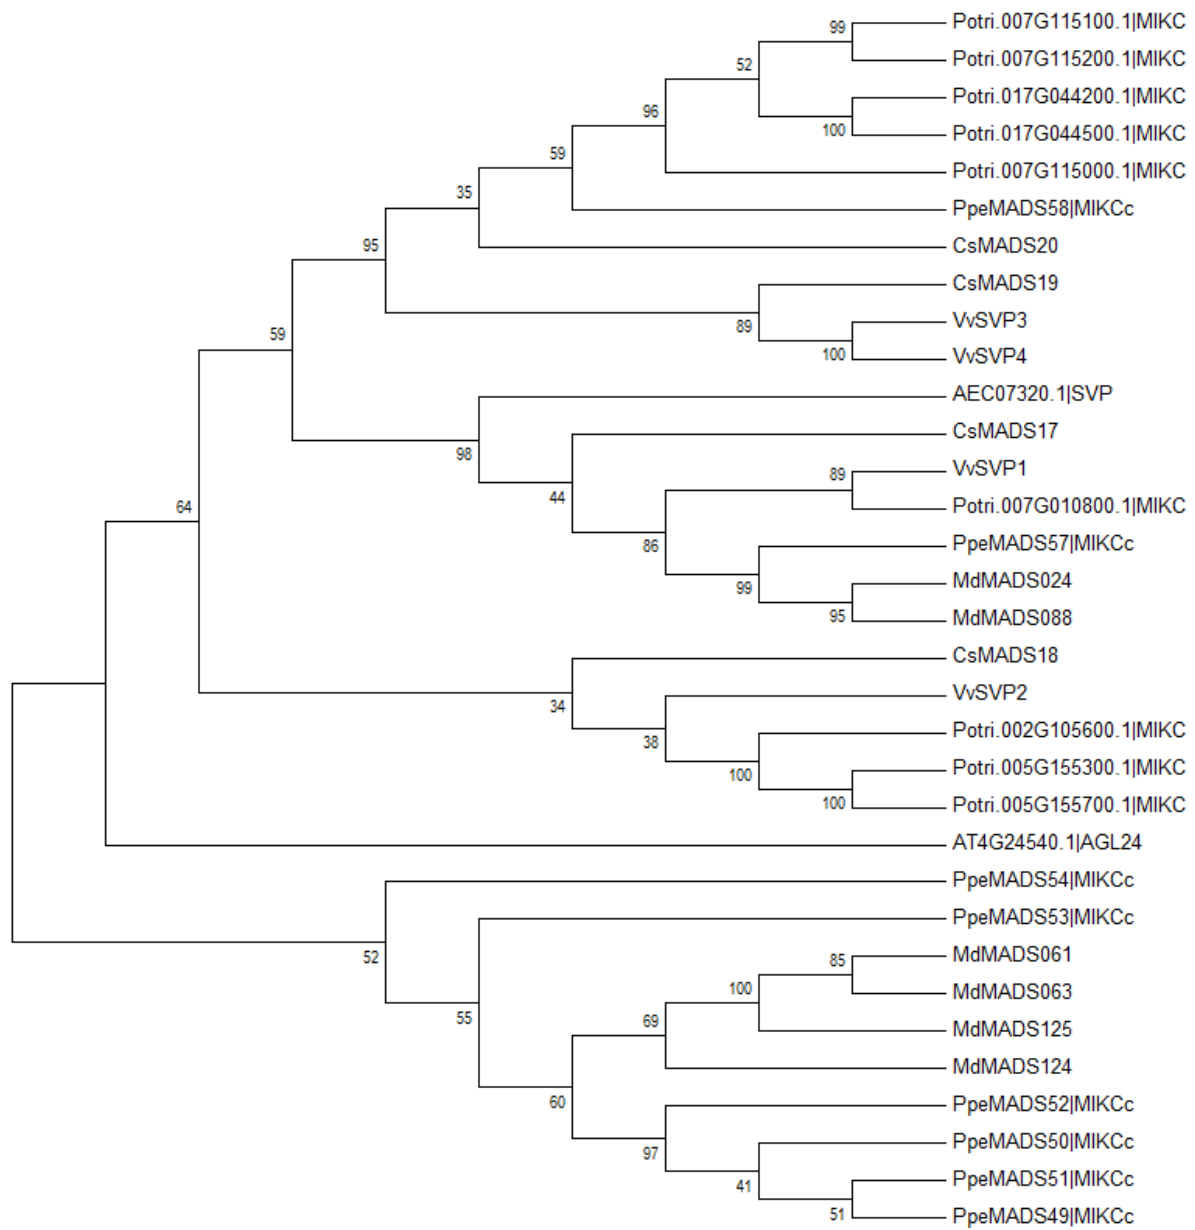

**Supplementary Figure S4.** Phylogenetic tree of SVP orthologs of apple and other eudicots (Arabidopsis, peach, poplar, cucumber and grape).

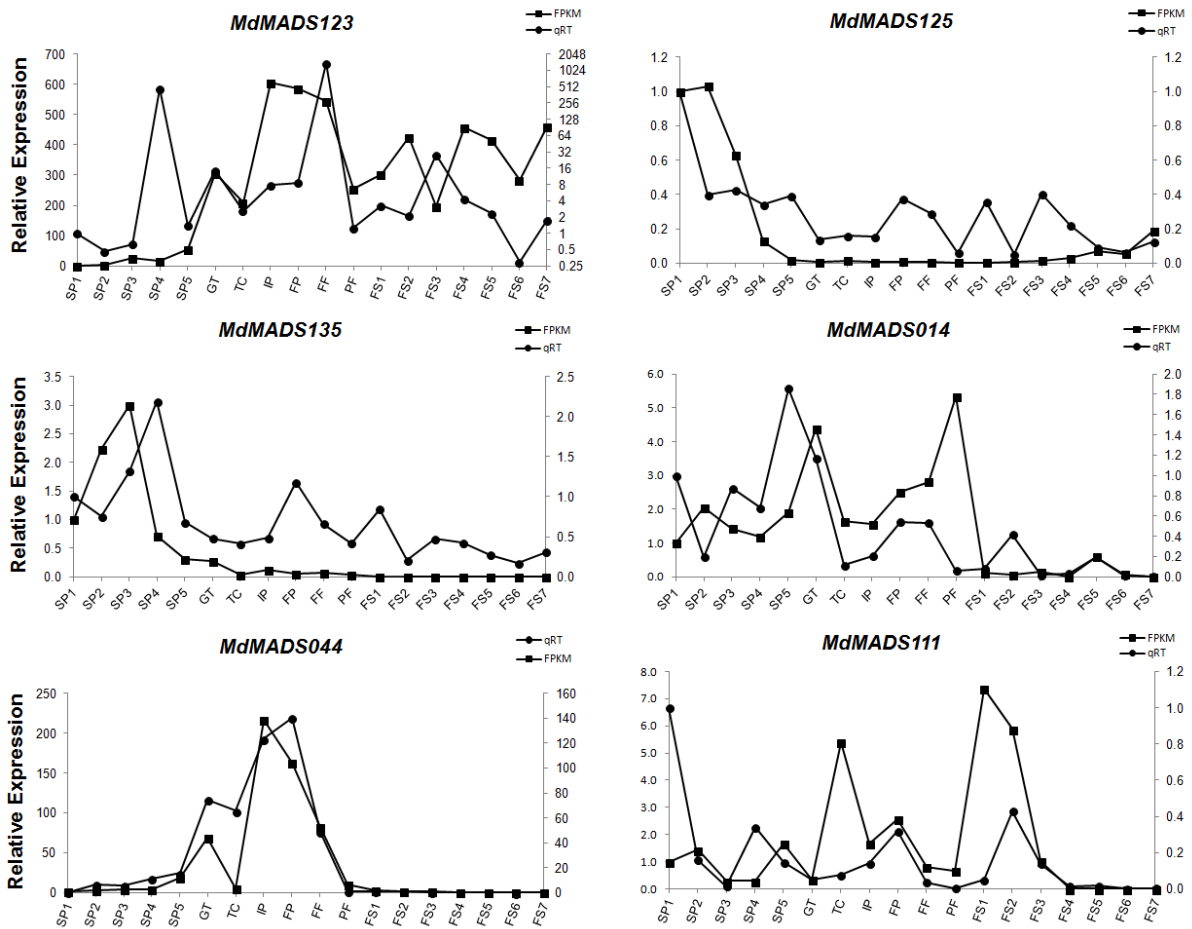

**Supplementary Figure S5.** Relative expression of various MdMADS genes based upon FPKM based expression value and validated by quantitative reverse transcriptase-polymerase chain reaction (qRT-PCR). Pearson correlation coefficient between fold change FPKM and qRT-PCR was 0.34 (p-value=0.0005)



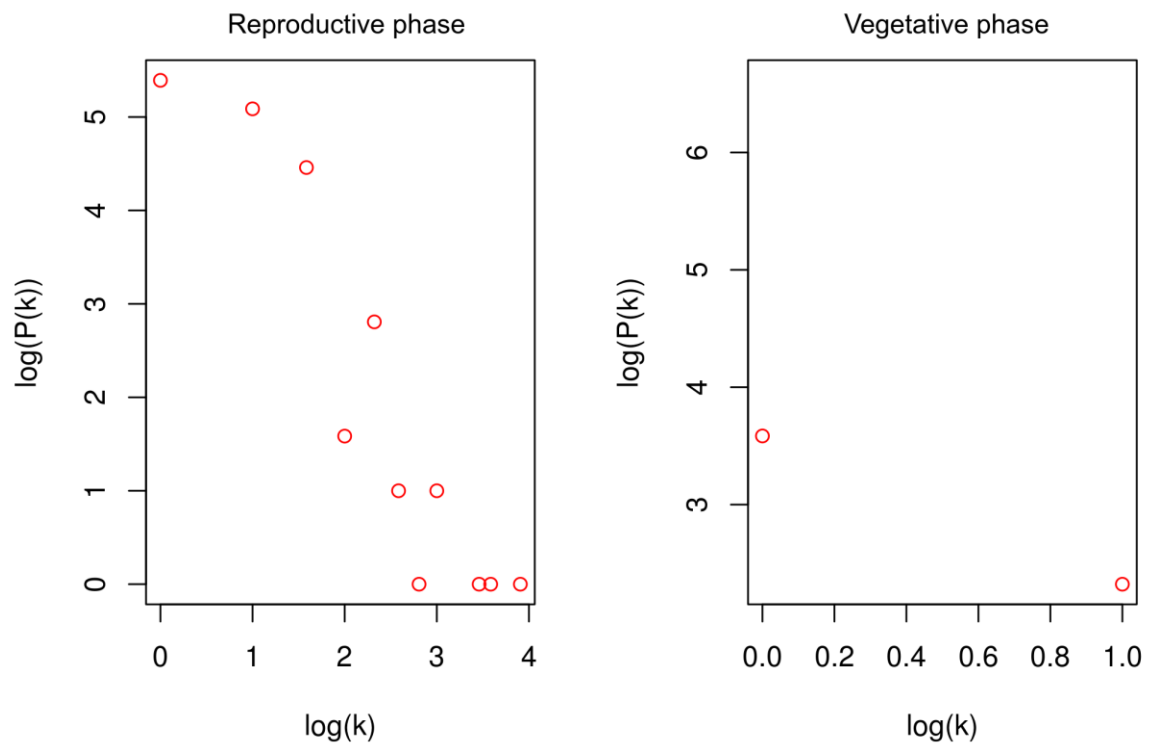

**Supplementary Figure S6.** Degree distributions of reproductive and vegetative phase network. The scatter plots show proteins (x-axis) versus the probability of a protein having  $k$  connections (y-axis). The reproductive phase network indicates scale-free nature.

**Supplementary Table S1.** List of MdMADS, their annotation and orthologs in Arabidopsis.

| Gene             | Protein   | protein identifier | RNA-seq contig | Chromosome no. | CDS length | Protein length | Strand | Regular / Non-regular | Type              | Duplication | At Ortholog | Score | E-value  |
|------------------|-----------|--------------------|----------------|----------------|------------|----------------|--------|-----------------------|-------------------|-------------|-------------|-------|----------|
| <i>MdMADS001</i> | MdMADS001 | MDP0000152718      | No hit         | chr01          | 471        | 156            | +      | Regular               | My                | Tandem      | AT5G48670.1 | 104   | 2.00E-23 |
| <i>MdMADS002</i> | MdMADS002 | MDP0000159587      | No hit         | chr01          | 471        | 156            | +      | Regular               | My                | Tandem      | AT5G48670.1 | 104   | 2.00E-23 |
| <i>MdMADS003</i> | MdMADS003 | MDP0000146415      | Contig_49861   | chr01          | 705        | 234            | -      | Non-regular           | MIKC <sup>+</sup> | Dispersed   | AT2G03060.2 | 108   | 2.00E-24 |
| <i>MdMADS004</i> | MdMADS004 | MDP0000133671      | No hit         | chr01          | 723        | 240            | +      | Regular               | My                | Dispersed   | AT5G48670.1 | 142   | 2.00E-34 |
| <i>MdMADS005</i> | MdMADS005 | MDP0000919323      | No hit         | chr01          | 303        | 101            | -      | Regular               | MIKC <sup>+</sup> | Dispersed   | AT2G03060.2 | 107   | 2.00E-24 |
| <i>MdMADS006</i> | MdMADS006 | MDP0000144597      | Contig_13746   | chr01          | 777        | 258            | +      | Regular               | MIKC <sup>C</sup> | Segmental   | AT5G62165.1 | 187   | 9.00E-48 |
| <i>MdMADS007</i> | MdMADS007 | MDP0000462145      | No hit         | chr01          | 597        | 199            | -      | Regular               | MIKC <sup>C</sup> | Tandem      | AT5G62165.1 | 139   | 2.00E-33 |
| <i>MdMADS008</i> | MdMADS008 | MDP0000249592      | Contig_8881    | chr01          | 675        | 224            | -      | Regular               | MIKC <sup>C</sup> | Tandem      | AT5G62165.4 | 179   | 1.00E-49 |
| <i>MdMADS009</i> | MdMADS009 | MDP0000449389      | No hit         | chr01          | 1254       | 418            | +      | Regular               | MIKC <sup>C</sup> | Segmental   | AT5G51890.1 | 360   | e-100    |
| <i>MdMADS010</i> | MdMADS010 | MDP0000200272      | No hit         | chr01          | 237        | 79             | +      | Regular               | MIKC <sup>C</sup> | Tandem      | AT5G62165.1 | 111   | 1.00E-25 |
| <i>MdMADS011</i> | MdMADS011 | MDP0000696331      | Contig_40581   | chr02          | 579        | 193            | -      | Regular               | Ma                | Dispersed   | AT2G24840.1 | 47    | 9.00E-06 |
| <i>MdMADS012</i> | MdMADS012 | MDP0000315938      | No hit         | chr02          | 699        | 232            | +      | Regular               | MIKC <sup>C</sup> | Tandem      | AT3G54340.1 | 194   | 4.00E-50 |
| <i>MdMADS013</i> | MdMADS013 | MDP0000184294      | Contig_25797   | chr02          | 699        | 232            | +      | Regular               | MIKC <sup>C</sup> | Tandem      | AT3G54340.1 | 194   | 4.00E-50 |
| <i>MdMADS014</i> | MdMADS014 | MDP0000314765      | Contig_30208   | chr02          | 759        | 252            | +      | Regular               | MIKC <sup>C</sup> | Dispersed   | AT2G45660.1 | 248   | 3.00E-66 |
| <i>MdMADS015</i> | MdMADS015 | MDP0000149676      | Contig_47159   | chr02          | 636        | 212            | +      | Regular               | MIKC <sup>C</sup> | Dispersed   | AT2G45650.1 | 121   | 3.00E-28 |
| <i>MdMADS016</i> | MdMADS016 | MDP0000237091      | No hit         | chr02          | 705        | 234            | -      | Regular               | Ma                | Dispersed   | AT5G60440.1 | 104   | 4.00E-23 |
| <i>MdMADS017</i> | MdMADS017 | MDP0000162019      | No hit         | chr02          | 1614       | 537            | -      | Non-regular           | Ma                | Dispersed   | AT2G24840.1 | 76    | 5.00E-14 |
| <i>MdMADS018</i> | MdMADS018 | MDP0000123878      | No hit         | chr02          | 387        | 128            | +      | Regular               | My                | Proximal    | AT5G48670.1 | 70    | 4.00E-13 |
| <i>MdMADS019</i> | MdMADS019 | MDP0000726295      | No hit         | chr02          | 387        | 129            | -      | Regular               | My                | Proximal    | AT5G48670.1 | 74    | 2.00E-14 |
| <i>MdMADS020</i> | MdMADS020 | MDP0000309181      | Contig_220     | chr02          | 1923       | 640            | -      | Regular               | Mβ                | Segmental   | AT2G41540.1 | 353   | 2.00E-97 |
| <i>MdMADS021</i> | MdMADS021 | MDP0000156783      | Contig_35108   | chr02          | 1017       | 338            | -      | Regular               | MIKC <sup>C</sup> | Segmental   | AT5G13790.1 | 186   | 2.00E-47 |
| <i>MdMADS022</i> | MdMADS022 | MDP0000136650      | Contig_35108   | chr02          | 1017       | 338            | -      | Regular               | MIKC <sup>C</sup> | Tandem      | AT5G13790.1 | 167   | 8.00E-42 |
| <i>MdMADS023</i> | MdMADS023 | MDP0000155389      | Contig_56230   | chr03          | 663        | 220            | -      | Regular               | Ma                | Segmental   | AT2G24840.1 | 106   | 1.00E-23 |
| <i>MdMADS024</i> | MdMADS024 | MDP0000209705      | Contig_34137   | chr04          | 687        | 228            | +      | Regular               | MIKC <sup>C</sup> | Dispersed   | AT2G22540.1 | 261   | 3.00E-70 |
| <i>MdMADS025</i> | MdMADS025 | MDP0000212925      | Contig_64541   | chr04          | 618        | 205            | +      | Regular               | My                | Segmental   | AT5G48670.1 | 105   | 2.00E-23 |
| <i>MdMADS026</i> | MdMADS026 | MDP0000129298      | No hit         | chr04          | 678        | 225            | +      | Non-regular           | My                | Proximal    | AT5G48670.1 | 122   | 2.00E-28 |
| <i>MdMADS027</i> | MdMADS027 | MDP0000250080      | Contig_35532   | chr05          | 696        | 231            | -      | Regular               | MIKC <sup>C</sup> | Segmental   | AT4G18960.1 | 290   | 4.00E-79 |
| <i>MdMADS028</i> | MdMADS028 | MDP0000120467      | No hit         | chr05          | 528        | 175            | -      | Regular               | Ma                | Segmental   | AT2G34440.1 | 125   | 1.00E-29 |
| <i>MdMADS029</i> | MdMADS029 | MDP0000696333      | No hit         | chr05          | 636        | 212            | -      | Regular               | Ma                | Dispersed   | AT5G60440.1 | 129   | 1.00E-30 |
| <i>MdMADS030</i> | MdMADS030 | MDP0000183226      | No hit         | chr05          | 597        | 199            | -      | Regular               | MIKC <sup>C</sup> | Tandem      | AT5G23260.2 | 155   | 1.00E-38 |

|                  |           |               |              |       |      |     |   |             |                   |           |             |     |          |
|------------------|-----------|---------------|--------------|-------|------|-----|---|-------------|-------------------|-----------|-------------|-----|----------|
| <i>MdMADS031</i> | MdMADS031 | MDP0000181583 | Contig_57607 | chr05 | 960  | 319 | - | Regular     | MIKC <sup>C</sup> | Tandem    | AT5G23260.2 | 185 | 3.00E-47 |
| <i>MdMADS032</i> | MdMADS032 | MDP0000179718 | No hit       | chr05 | 513  | 171 | - | Regular     | MIKC <sup>C</sup> | Tandem    | AT5G23260.2 | 106 | 7.00E-24 |
| <i>MdMADS033</i> | MdMADS033 | MDP0000234073 | No hit       | chr05 | 576  | 192 | - | Regular     | MIKC <sup>C</sup> | Tandem    | AT5G23260.2 | 156 | 9.00E-39 |
| <i>MdMADS034</i> | MdMADS034 | MDP0000224779 | No hit       | chr05 | 723  | 240 | - | Regular     | MIKC <sup>C</sup> | Dispersed | AT3G54340.1 | 200 | 6.00E-52 |
| <i>MdMADS035</i> | MdMADS035 | MDP0000233925 | No hit       | chr05 | 648  | 215 | + | Regular     | Ma                | Tandem    | AT5G60440.1 | 209 | 2.00E-54 |
| <i>MdMADS036</i> | MdMADS036 | MDP0000233926 | No hit       | chr05 | 408  | 135 | + | Regular     | Ma                | Tandem    | AT2G24840.1 | 99  | 6.00E-22 |
| <i>MdMADS037</i> | MdMADS037 | MDP0000278770 | No hit       | chr05 | 1008 | 335 | - | Regular     | Ma                | Tandem    | AT5G60440.1 | 225 | 3.00E-59 |
| <i>MdMADS038</i> | MdMADS038 | MDP0000228942 | No hit       | chr05 | 324  | 107 | + | Regular     | MIKC <sup>C</sup> | Proximal  | AT2G14210.1 | 119 | 5.00E-28 |
| <i>MdMADS039</i> | MdMADS039 | MDP0000475549 | No hit       | chr05 | 435  | 145 | + | Regular     | MIKC <sup>C</sup> | Proximal  | AT4G37940.1 | 152 | 1.00E-37 |
| <i>MdMADS040</i> | MdMADS040 | MDP0000451827 | Contig_63558 | chr06 | 822  | 274 | + | Non-regular | My                | Proximal  | AT5G48670.1 | 89  | 3.00E-18 |
| <i>MdMADS041</i> | MdMADS041 | MDP0000299637 | No hit       | chr06 | 645  | 214 | + | Regular     | My                | Tandem    | AT5G48670.1 | 141 | 3.00E-34 |
| <i>MdMADS042</i> | MdMADS042 | MDP0000236438 | No hit       | chr06 | 612  | 203 | - | Regular     | My                | Tandem    | AT5G48670.1 | 135 | 2.00E-32 |
| <i>MdMADS043</i> | MdMADS043 | MDP0000664841 | No hit       | chr06 | 1071 | 357 | - | Regular     | Mβ                | Dispersed | AT5G55690.1 | 72  | 4.00E-13 |
| <i>MdMADS044</i> | MdMADS044 | MDP0000133037 | Contig_33505 | chr06 | 723  | 240 | + | Regular     | MIKC <sup>C</sup> | Dispersed | AT3G54340.1 | 200 | 6.00E-52 |
| <i>MdMADS045</i> | MdMADS045 | MDP0000312382 | Contig_22559 | chr06 | 1590 | 529 | + | Regular     | MIKC <sup>C</sup> | Segmental | AT3G48680.1 | 378 | e-105    |
| <i>MdMADS046</i> | MdMADS046 | MDP0000132226 | No hit       | chr06 | 429  | 143 | - | Regular     | MIKC <sup>C</sup> | Dispersed | AT4G24540.1 | 82  | 8.00E-17 |
| <i>MdMADS047</i> | MdMADS047 | MDP0000670559 | No hit       | chr06 | 1002 | 334 | - | Non-regular | Mβ                | Singleton | AT5G65330.1 | 55  | 5.00E-08 |
| <i>MdMADS048</i> | MdMADS048 | MDP0000193129 | Contig_41493 | chr06 | 2226 | 741 | - | Regular     | MIKC <sup>*</sup> | Segmental | AT1G18750.1 | 299 | 6.00E-81 |
| <i>MdMADS049</i> | MdMADS049 | MDP0000574222 | Contig_48525 | chr06 | 564  | 188 | + | Regular     | MIKC <sup>C</sup> | Segmental | AT2G03710.2 | 163 | 5.00E-41 |
| <i>MdMADS050</i> | MdMADS050 | MDP0000218020 | Contig_61394 | chr06 | 900  | 299 | - | Regular     | MIKC <sup>C</sup> | Segmental | AT5G60910.1 | 243 | 1.00E-64 |
| <i>MdMADS051</i> | MdMADS051 | MDP0000254052 | Contig_35107 | chr07 | 810  | 269 | - | Regular     | MIKC <sup>C</sup> | Segmental | AT5G13790.1 | 214 | 6.00E-56 |
| <i>MdMADS052</i> | MdMADS052 | MDP0000216605 | No hit       | chr07 | 1019 | 339 | - | Non-regular | Mβ                | Dispersed | AT2G39970.1 | 56  | 3.00E-08 |
| <i>MdMADS053</i> | MdMADS053 | MDP0000127771 | Contig_8136  | chr07 | 312  | 103 | + | Regular     | MIKC <sup>C</sup> | Dispersed | AT2G03710.3 | 61  | 1.00E-10 |
| <i>MdMADS054</i> | MdMADS054 | MDP0000148857 | Contig_8675  | chr07 | 492  | 163 | + | Regular     | MIKC <sup>C</sup> | Dispersed | AT2G45660.1 | 120 | 5.00E-28 |
| <i>MdMADS055</i> | MdMADS055 | MDP0000783966 | No hit       | chr07 | 264  | 88  | + | Regular     | Ma                | Dispersed | AT4G37940.1 | 116 | 3.00E-27 |
| <i>MdMADS056</i> | MdMADS056 | MDP0000060753 | Contig_19842 | chr07 | 591  | 197 | + | Regular     | MIKC <sup>C</sup> | Proximal  | AT5G62165.1 | 205 | 1.00E-53 |
| <i>MdMADS057</i> | MdMADS057 | MDP0000220168 | No hit       | chr08 | 657  | 218 | + | Regular     | MIKC <sup>C</sup> | Dispersed | AT3G54340.1 | 213 | 5.00E-56 |
| <i>MdMADS058</i> | MdMADS058 | MDP0000152821 | Contig_40010 | chr08 | 1437 | 478 | + | Regular     | MIKC <sup>C</sup> | Dispersed | AT1G22130.1 | 104 | 2.00E-22 |
| <i>MdMADS059</i> | MdMADS059 | MDP0000243965 | Contig_59418 | chr08 | 1044 | 347 | - | Regular     | MIKC <sup>*</sup> | Dispersed | AT1G22130.1 | 225 | 4.00E-59 |
| <i>MdMADS060</i> | MdMADS060 | MDP0000286643 | No hit       | chr08 | 762  | 253 | + | Regular     | MIKC <sup>C</sup> | Dispersed | AT5G20240.1 | 241 | 2.00E-64 |
| <i>MdMADS061</i> | MdMADS061 | MDP0000259294 | No hit       | chr08 | 786  | 261 | + | Regular     | MIKC <sup>C</sup> | Segmental | AT4G24540.1 | 101 | 4.00E-22 |
| <i>MdMADS062</i> | MdMADS062 | MDP0000259296 | No hit       | chr08 | 372  | 123 | + | Regular     | MIKC <sup>C</sup> | Proximal  | AT4G24540.1 | 94  | 2.00E-20 |
| <i>MdMADS063</i> | MdMADS063 | MDP0000527190 | Contig_2275  | chr08 | 870  | 290 | - | Regular     | MIKC <sup>C</sup> | Proximal  | AT4G24540.1 | 114 | 8.00E-26 |

|                  |           |               |              |       |      |     |   |             |                   |           |             |     |          |
|------------------|-----------|---------------|--------------|-------|------|-----|---|-------------|-------------------|-----------|-------------|-----|----------|
| <i>MdMADS064</i> | MdMADS064 | MDP0000378412 | No hit       | chr08 | 516  | 172 | - | Regular     | MIKC <sup>C</sup> | Proximal  | AT4G24540.1 | 97  | 7.00E-21 |
| <i>MdMADS065</i> | MdMADS065 | MDP0000925348 | No hit       | chr08 | 768  | 256 | - | Regular     | My                | Segmental | AT5G48670.1 | 202 | 1.00E-52 |
| <i>MdMADS066</i> | MdMADS066 | MDP0000315764 | Contig_22333 | chr08 | 1925 | 640 | - | Non-regular | MIKC <sup>C</sup> | Segmental | AT1G33780.1 | 351 | 8.00E-97 |
| <i>MdMADS067</i> | MdMADS067 | MDP0000193953 | No hit       | chr08 | 309  | 103 | - | Regular     | MIKC <sup>C</sup> | Tandem    | AT1G71692.1 | 122 | 4.00E-29 |
| <i>MdMADS068</i> | MdMADS068 | MDP0000192806 | No hit       | chr08 | 309  | 103 | - | Regular     | MIKC <sup>C</sup> | Tandem    | AT1G71692.1 | 122 | 4.00E-29 |
| <i>MdMADS069</i> | MdMADS069 | MDP0000296123 | No hit       | chr09 | 1026 | 341 | - | Regular     | Mβ                | Dispersed | AT5G55690.1 | 64  | 2.00E-10 |
| <i>MdMADS070</i> | MdMADS070 | MDP0000289858 | Contig_39835 | chr09 | 654  | 217 | - | Regular     | MIKC <sup>C</sup> | Segmental | AT3G02310.1 | 293 | 8.00E-80 |
| <i>MdMADS071</i> | MdMADS071 | MDP0000605482 | No hit       | chr09 | 450  | 150 | + | Regular     | MIKC <sup>C</sup> | Tandem    | AT5G15800.1 | 245 | 7.00E-66 |
| <i>MdMADS072</i> | MdMADS072 | MDP0000132738 | Contig_37268 | chr09 | 312  | 103 | - | Regular     | MIKC <sup>C</sup> | Segmental | AT5G60910.1 | 115 | 5.00E-27 |
| <i>MdMADS073</i> | MdMADS073 | MDP0000143531 | No hit       | chr09 | 357  | 118 | - | Regular     | MIKC <sup>C</sup> | Proximal  | AT4G24540.1 | 84  | 1.00E-17 |
| <i>MdMADS074</i> | MdMADS074 | MDP0000223851 | No hit       | chr09 | 315  | 104 | + | Regular     | MIKC <sup>C</sup> | Proximal  | AT4G24540.1 | 80  | 4.00E-16 |
| <i>MdMADS075</i> | MdMADS075 | MDP0000324259 | Contig_9560  | chr09 | 727  | 243 | - | Regular     | MIKC <sup>C</sup> | Tandem    | AT3G58780.1 | 335 | 1.00E-92 |
| <i>MdMADS076</i> | MdMADS076 | MDP0000611204 | No hit       | chr09 | 756  | 252 | + | Non-regular | Ma                | Dispersed | AT2G22540.1 | 70  | 2.00E-12 |
| <i>MdMADS077</i> | MdMADS077 | MDP0000291070 | Contig_4705  | chr09 | 1782 | 593 | + | Non-regular | Ma                | Tandem    | AT1G17350.1 | 268 | 7.00E-72 |
| <i>MdMADS078</i> | MdMADS078 | MDP0000518032 | Contig_27449 | chr09 | 321  | 107 | - | Regular     | MIKC <sup>C</sup> | Dispersed | AT4G22950.1 | 80  | 2.00E-16 |
| <i>MdMADS079</i> | MdMADS079 | MDP0000254632 | No hit       | chr09 | 1320 | 439 | - | Non-regular | My                | Dispersed | AT5G26630.1 | 102 | 8.00E-22 |
| <i>MdMADS080</i> | MdMADS080 | MDP0000123808 | No hit       | chr09 | 612  | 203 | - | Regular     | Mβ                | Proximal  | AT5G55690.1 | 55  | 4.00E-08 |
| <i>MdMADS081</i> | MdMADS081 | MDP0000270062 | Contig_10606 | chr10 | 1173 | 390 | - | Regular     | MIKC <sup>C</sup> | Tandem    | AT4G22950.1 | 189 | 3.00E-48 |
| <i>MdMADS082</i> | MdMADS082 | MDP0000248130 | Contig_30632 | chr10 | 540  | 179 | + | Non-regular | MIKC <sup>C</sup> | Tandem    | AT4G11880.1 | 115 | 1.00E-26 |
| <i>MdMADS083</i> | MdMADS083 | MDP0000205637 | No hit       | chr10 | 792  | 263 | - | Non-regular | MIKC <sup>C</sup> | Tandem    | AT5G23150.1 | 113 | 1.00E-25 |
| <i>MdMADS084</i> | MdMADS084 | MDP0000274606 | No hit       | chr10 | 543  | 180 | + | Regular     | Ma                | Segmental | AT2G34440.1 | 127 | 6.00E-30 |
| <i>MdMADS085</i> | MdMADS085 | MDP0000324166 | No hit       | chr10 | 730  | 244 | - | Regular     | MIKC <sup>C</sup> | Segmental | AT4G18960.1 | 356 | 8.00E-99 |
| <i>MdMADS086</i> | MdMADS086 | MDP0000316609 | Contig_48693 | chr10 | 720  | 239 | + | Regular     | MIKC <sup>C</sup> | Proximal  | AT1G71692.1 | 219 | 9.00E-58 |
| <i>MdMADS087</i> | MdMADS087 | MDP0000311107 | Contig_62351 | chr10 | 1164 | 387 | + | Non-regular | MIKC <sup>C</sup> | Dispersed | AT4G24540.1 | 73  | 4.00E-13 |
| <i>MdMADS088</i> | MdMADS088 | MDP0000233948 | Contig_40529 | chr11 | 765  | 254 | + | Regular     | MIKC <sup>C</sup> | Segmental | AT2G22540.1 | 102 | 2.00E-53 |
| <i>MdMADS089</i> | MdMADS089 | MDP0000314058 | No hit       | chr11 | 1707 | 568 | + | Non-regular | Ma                | Segmental | AT2G24840.1 | 205 | 9.00E-22 |
| <i>MdMADS090</i> | MdMADS090 | MDP0000233843 | Contig_24584 | chr11 | 182  | 61  | + | Regular     | MIKC <sup>C</sup> | Tandem    | AT2G22540.1 | 112 | 4.00E-26 |
| <i>MdMADS091</i> | MdMADS091 | MDP0000523644 | No hit       | chr12 | 579  | 193 | - | Regular     | Ma                | Segmental | AT5G60440.1 | 90  | 9.00E-19 |
| <i>MdMADS092</i> | MdMADS092 | MDP0000713024 | No hit       | chr12 | 606  | 202 | - | Non-regular | Ma                | Proximal  | AT5G60440.1 | 90  | 1.00E-18 |
| <i>MdMADS093</i> | MdMADS093 | MDP0000232338 | No hit       | chr12 | 1008 | 335 | - | Non-regular | Ma                | Proximal  | AT2G24840.1 | 78  | 8.00E-15 |
| <i>MdMADS094</i> | MdMADS094 | MDP0000307605 | No hit       | chr12 | 639  | 212 | - | Regular     | My                | Segmental | AT5G48670.1 | 117 | 6.00E-27 |
| <i>MdMADS095</i> | MdMADS095 | MDP0000834768 | No hit       | chr12 | 231  | 77  | + | Regular     | My                | Segmental | AT5G48670.1 | 78  | 1.00E-15 |
| <i>MdMADS096</i> | MdMADS096 | MDP0000599449 | No hit       | chr12 | 678  | 226 | - | Regular     | My                | Proximal  | AT5G48670.1 | 115 | 2.00E-26 |
| <i>MdMADS097</i> | MdMADS097 | MDP0000269921 | Contig_42886 | chr13 | 624  | 207 | - | Regular     | MIKC <sup>C</sup> | Proximal  | AT1G69120.1 | 271 | 2.00E-73 |

|                  |           |               |              |            |      |     |   |             |                   |           |             |     |          |
|------------------|-----------|---------------|--------------|------------|------|-----|---|-------------|-------------------|-----------|-------------|-----|----------|
| <i>MdMADS098</i> | MdMADS098 | MDP0000326906 | No hit       | chr13      | 692  | 231 | + | Regular     | MIKC <sup>C</sup> | Segmental | AT2G03710.2 | 241 | 3.00E-64 |
| <i>MdMADS099</i> | MdMADS099 | MDP0000146231 | Contig_38809 | chr13      | 1212 | 403 | + | Regular     | MIKC*             | Segmental | AT2G03060.2 | 278 | 6.00E-75 |
| <i>MdMADS100</i> | MdMADS100 | MDP0000370413 | No hit       | chr13      | 471  | 157 | - | Regular     | MIKC <sup>C</sup> | Dispersed | AT1G24260.1 | 259 | 5.00E-70 |
| <i>MdMADS101</i> | MdMADS101 | MDP0000285581 | No hit       | chr13      | 735  | 244 | + | Non-regular | MIKC <sup>C</sup> | Dispersed | AT4G37940.1 | 114 | 7.00E-26 |
| <i>MdMADS102</i> | MdMADS102 | MDP0000229755 | Contig_4976  | chr13      | 966  | 321 | + | Non-regular | Mβ                | Dispersed | AT2G39970.1 | 80  | 1.00E-15 |
| <i>MdMADS103</i> | MdMADS103 | MDP0000221590 | Contig_2967  | chr14      | 1065 | 354 | - | Regular     | Ma                | Dispersed | AT5G60440.1 | 155 | 3.00E-38 |
| <i>MdMADS104</i> | MdMADS104 | MDP0000296791 | No hit       | chr14      | 771  | 256 | - | Non-regular | My                | Dispersed | AT2G40210.1 | 101 | 5.00E-22 |
| <i>MdMADS105</i> | MdMADS105 | MDP0000287530 | No hit       | chr14      | 399  | 132 | - | Regular     | Ma                | Segmental | AT5G60440.1 | 73  | 5.00E-14 |
| <i>MdMADS106</i> | MdMADS106 | MDP0000289392 | No hit       | chr14      | 441  | 146 | - | Regular     | Ma                | Proximal  | AT5G60440.1 | 57  | 4.00E-09 |
| <i>MdMADS107</i> | MdMADS107 | MDP0000773068 | No hit       | chr14      | 264  | 88  | - | Regular     | MIKC*             | Dispersed | AT2G03060.2 | 108 | 1.00E-24 |
| <i>MdMADS108</i> | MdMADS108 | MDP0000135652 | Contig_53993 | chr14      | 603  | 200 | + | Regular     | MIKC <sup>C</sup> | Tandem    | AT3G57390.1 | 148 | 2.00E-36 |
| <i>MdMADS109</i> | MdMADS109 | MDP0000144516 | Contig_53993 | chr14      | 801  | 266 | - | Regular     | MIKC <sup>C</sup> | Tandem    | AT3G57390.1 | 160 | 1.00E-39 |
| <i>MdMADS110</i> | MdMADS110 | MDP0000322264 | Contig_2034  | chr14      | 810  | 269 | + | Non-regular | Mβ                | Dispersed | AT2G39970.1 | 90  | 1.00E-18 |
| <i>MdMADS111</i> | MdMADS111 | MDP0000300752 | Contig_29003 | chr14      | 636  | 211 | - | Regular     | MIKC <sup>C</sup> | Dispersed | AT4G09960.2 | 150 | 4.00E-37 |
| <i>MdMADS112</i> | MdMADS112 | MDP0000326390 | Contig_29027 | chr14      | 745  | 249 | + | Regular     | MIKC <sup>C</sup> | Segmental | AT3G02310.1 | 288 | 2.00E-78 |
| <i>MdMADS113</i> | MdMADS113 | MDP0000289836 | Contig_42405 | chr14      | 861  | 286 | - | Regular     | MIKC <sup>C</sup> | Segmental | AT5G60910.1 | 270 | 9.00E-73 |
| <i>MdMADS114</i> | MdMADS114 | MDP0000846004 | No hit       | chr15      | 765  | 255 | + | Regular     | My                | Segmental | AT5G48670.1 | 184 | 4.00E-47 |
| <i>MdMADS115</i> | MdMADS115 | MDP0000234911 | No hit       | chr15      | 429  | 142 | + | Regular     | MIKC <sup>C</sup> | Dispersed | AT2G14210.1 | 119 | 5.00E-28 |
| <i>MdMADS116</i> | MdMADS116 | MDP0000134211 | No hit       | chr15      | 267  | 88  | + | Regular     | My                | Singleton | AT2G40210.1 | 42  | 9.00E-05 |
| <i>MdMADS117</i> | MdMADS117 | MDP0000186886 | Contig_33310 | chr15      | 813  | 270 | + | Regular     | My                | Tandem    | AT5G48670.1 | 84  | 8.00E-17 |
| <i>MdMADS118</i> | MdMADS118 | MDP0000192342 | No hit       | chr15      | 552  | 183 | + | Regular     | My                | Tandem    | AT1G22590.2 | 83  | 8.00E-17 |
| <i>MdMADS119</i> | MdMADS119 | MDP0000303501 | No hit       | chr15      | 927  | 308 | + | Non-regular | Mβ                | Dispersed | AT5G55690.1 | 62  | 4.00E-10 |
| <i>MdMADS120</i> | MdMADS120 | MDP0000013331 | Contig_32487 | chr16      | 714  | 238 | - | Regular     | MIKC <sup>C</sup> | Segmental | AT1G69120.1 | 299 | 9.00E-82 |
| <i>MdMADS121</i> | MdMADS121 | MDP0000280009 | Contig_36698 | chr16      | 786  | 261 | - | Regular     | MIKC <sup>C</sup> | Segmental | AT5G15800.1 | 240 | 8.00E-64 |
| <i>MdMADS122</i> | MdMADS122 | MDP0000147667 | Contig_41802 | chr16      | 1419 | 472 | - | Regular     | MIKC*             | Segmental | AT2G03060.2 | 265 | 6.00E-71 |
| <i>MdMADS123</i> | MdMADS123 | MDP0000220008 | Contig_41430 | chr16      | 858  | 285 | + | Regular     | MIKC <sup>C</sup> | Segmental | AT1G24260.2 | 300 | 7.00E-82 |
| <i>MdMADS124</i> | MdMADS124 | MDP0000255146 | No hit       | chr16      | 924  | 307 | - | Regular     | MIKC <sup>C</sup> | Proximal  | AT4G24540.1 | 97  | 2.00E-20 |
| <i>MdMADS125</i> | MdMADS125 | MDP0000322567 | Contig_168   | chr16      | 741  | 246 | - | Regular     | MIKC <sup>C</sup> | Proximal  | AT4G24540.1 | 114 | 6.00E-26 |
| <i>MdMADS126</i> | MdMADS126 | MDP0000277582 | Contig_10477 | chr17      | 738  | 245 | + | Non-regular | MIKC <sup>C</sup> | Dispersed | AT4G24540.1 | 86  | 2.00E-17 |
| <i>MdMADS127</i> | MdMADS127 | MDP0000366022 | Contig_49417 | chr17      | 757  | 253 | + | Regular     | MIKC <sup>C</sup> | Segmental | AT3G02310.1 | 332 | 2.00E-91 |
| <i>MdMADS128</i> | MdMADS128 | MDP0000242009 | Contig_41021 | chr17      | 783  | 260 | - | Regular     | MIKC <sup>C</sup> | Segmental | AT3G58780.3 | 292 | 2.00E-79 |
| <i>MdMADS129</i> | MdMADS129 | MDP0000315688 | No hit       | chr17      | 750  | 249 | + | Regular     | Ma                | Dispersed | AT5G60440.1 | 75  | 3.00E-14 |
| <i>MdMADS130</i> | MdMADS130 | MDP0000128016 | No hit       | Unanchored | 420  | 140 | - | Regular     | MIKC <sup>C</sup> | Tandem    | AT5G23260.2 | 152 | 6.00E-38 |
| <i>MdMADS131</i> | MdMADS131 | MDP0000138447 | No hit       | unanchored | 312  | 103 | - | Regular     | MIKC <sup>C</sup> | Dispersed | AT1G24260.2 | 57  | 2.00E-09 |

|                  |           |               |              |            |      |     |   |             |                   |           |             |     |          |
|------------------|-----------|---------------|--------------|------------|------|-----|---|-------------|-------------------|-----------|-------------|-----|----------|
| <i>MdMADS132</i> | MdMADS132 | MDP0000159062 | No hit       | unanchored | 612  | 203 | + | Regular     | Mα                | Proximal  | AT2G24840.1 | 110 | 6.00E-25 |
| <i>MdMADS133</i> | MdMADS133 | MDP0000168914 | No hit       | unanchored | 714  | 237 | - | Regular     | Mα                | Tandem    | AT5G60440.1 | 179 | 1.00E-45 |
| <i>MdMADS134</i> | MdMADS134 | MDP0000185853 | No hit       | unanchored | 948  | 315 | + | Regular     | Mβ                | Dispersed | AT5G55690.1 | 69  | 4.00E-12 |
| <i>MdMADS135</i> | MdMADS135 | MDP0000186558 | Contig_28    | unanchored | 648  | 215 | + | Non-regular | MIKC <sup>C</sup> | Proximal  | AT2G03710.2 | 98  | 4.00E-21 |
| <i>MdMADS136</i> | MdMADS136 | MDP0000218227 | Contig_2858  | unanchored | 279  | 92  | + | Regular     | MIKC <sup>C</sup> | Proximal  | AT5G15800.1 | 96  | 5.00E-21 |
| <i>MdMADS137</i> | MdMADS137 | MDP0000251651 | Contig_19389 | unanchored | 1594 | 530 | - | Non-regular | Mβ                | Proximal  | AT1G58110.1 | 149 | 5.00E-36 |
| <i>MdMADS138</i> | MdMADS138 | MDP0000268317 | No hit       | unanchored | 419  | 140 | + | Regular     | MIKC <sup>C</sup> | Dispersed | AT4G09960.1 | 238 | 1.00E-63 |
| <i>MdMADS139</i> | MdMADS139 | MDP0000278738 | Contig_33460 | unanchored | 771  | 256 | + | Regular     | MIKC <sup>C</sup> | Segmental | AT5G23260.3 | 167 | 5.00E-42 |
| <i>MdMADS140</i> | MdMADS140 | MDP0000314422 | No hit       | unanchored | 1833 | 610 | - | Non-regular | Mα                | Proximal  | AT2G24840.1 | 117 | 2.00E-26 |
| <i>MdMADS141</i> | MdMADS141 | MDP0000434703 | No hit       | unanchored | 684  | 228 | - | Regular     | Mα                | Tandem    | AT5G60440.1 | 227 | 6.00E-60 |
| <i>MdMADS142</i> | MdMADS142 | MDP0000753870 | No hit       | unanchored | 1086 | 362 | - | Regular     | Mβ                | Dispersed | AT5G55690.1 | 98  | 1.00E-20 |

**Supplementary Table S2.** Comparison of MdMADS identified in present study with that of MdMADS identified by Tian et al. (2015).

| Present study        | Tian et al., 2015         |               | Previously identified MdMADS accession no. |
|----------------------|---------------------------|---------------|--------------------------------------------|
| Present nomenclature | Dong et al., nomenclature | MDP ID        |                                            |
| MdMADS001            | MdMADS133                 | MDP0000152718 |                                            |
| MdMADS002            |                           |               |                                            |
| MdMADS003            | MdMADS139                 | MDP0000146415 |                                            |
| MdMADS004            | MdMADS132                 | MDP0000133671 |                                            |
| MdMADS005            | MdMADS80                  | MDP0000919323 |                                            |
| MdMADS006            | MdMADS73                  | MDP0000144597 |                                            |
| MdMADS007            | MdMADS75                  | MDP0000462145 |                                            |
| MdMADS008            | MdMADS21                  | MDP0000249592 | HM122605                                   |
| MdMADS009            | MdMADS65                  | MDP0000449389 |                                            |
| MdMADS010            | MdMADS63                  | MDP0000200272 |                                            |
| MdMADS011            | MdMADS101                 | MDP0000696331 |                                            |
| MdMADS012            | MdMADS13                  | MDP0000315938 | AJ251116                                   |
| MdMADS013            | MdMADS39                  | MDP0000184294 |                                            |
| MdMADS014            | MdMADS26                  | MDP0000314765 |                                            |
| MdMADS015            | MdMADS11                  | MDP0000149676 | AJ000763                                   |
| MdMADS016            | MdMADS88                  | MDP0000237091 |                                            |
| MdMADS017            | MdMADS144                 | MDP0000162019 |                                            |
| MdMADS018            |                           | MDP0000123878 |                                            |
| MdMADS019            |                           | MDP0000726295 |                                            |
| MdMADS020            | MdMADS121                 | MDP0000309181 |                                            |
| MdMADS021            | MdMADS32                  | MDP0000156783 |                                            |
| MdMADS022            | MdMADS31                  | MDP0000136650 |                                            |
| MdMADS023            | MdMADS92                  | MDP0000155389 |                                            |
| MdMADS024            |                           | MDP0000209705 |                                            |
| MdMADS025            | MdMADS134                 | MDP0000212925 |                                            |
| MdMADS026            | MdMADS131                 | MDP0000129298 |                                            |
| MdMADS027            | MdMADS22                  | MDP0000250080 | HM122606                                   |
| MdMADS028            | MdMADS83                  | MDP0000120467 |                                            |
| MdMADS029            | MdMADS102                 | MDP0000696333 |                                            |
| MdMADS030            | MdMADS106                 | MDP0000183226 |                                            |
| MdMADS031            | MdMADS105                 | MDP0000181583 |                                            |
| MdMADS032            | MdMADS112                 | MDP0000179718 |                                            |
| MdMADS033            | MdMADS107                 | MDP0000234073 |                                            |
| MdMADS034            | MdMADS40                  | MDP0000224779 |                                            |
| MdMADS035            | MdMADS86                  | MDP0000233925 |                                            |
| MdMADS036            | MdMADS87                  | MDP0000233926 |                                            |
| MdMADS037            | MdMADS90                  | MDP0000278770 |                                            |
| MdMADS038            | MdMADS53                  | MDP0000228942 |                                            |
| MdMADS039            | MdMADS54                  | MDP0000475549 |                                            |
| MdMADS040            | MdMADS137                 | MDP0000451827 |                                            |
| MdMADS041            | MdMADS125                 | MDP0000299637 |                                            |
| MdMADS042            | MdMADS135                 | MDP0000236438 |                                            |
| MdMADS043            | MdMADS124                 | MDP0000664841 |                                            |
| MdMADS044            | MdMADS38                  | MDP0000133037 |                                            |
| MdMADS045            | MdMADS71                  | MDP0000312382 |                                            |
| MdMADS046            | MdMADS48                  | MDP0000132226 |                                            |
| MdMADS047            |                           | MDP0000670559 |                                            |
| MdMADS048            | MdMADS79                  | MDP0000193129 |                                            |
| MdMADS049            | MdMADS6                   | MDP0000574222 | AJ000760                                   |
| MdMADS050            | MdMADS36                  | MDP0000218020 |                                            |
| MdMADS051            | MdMADS33                  | MDP0000254052 |                                            |
| MdMADS052            |                           | MDP0000216605 |                                            |

|           |           |               |                 |
|-----------|-----------|---------------|-----------------|
| MdMADS053 | MdMADS110 | MDP0000127771 |                 |
| MdMADS054 | MdMADS68  | MDP0000148857 |                 |
| MdMADS055 | MdMADS59  | MDP0000783966 |                 |
| MdMADS056 | MdMADS64  | MDP0000060753 |                 |
| MdMADS057 | MdMADS23  | MDP0000220168 | HM122607        |
| MdMADS058 | MdMADS76  | MDP0000152821 |                 |
| MdMADS059 | MdMADS77  | MDP0000243965 |                 |
| MdMADS060 | MdMADS24  | MDP0000286643 |                 |
| MdMADS061 | MdMADS43  | MDP0000259294 |                 |
| MdMADS062 | MdMADS44  | MDP0000259296 |                 |
| MdMADS063 | MdMADS20  | MDP0000527190 | HM122604        |
| MdMADS064 | MdMADS47  | MDP0000378412 |                 |
| MdMADS065 | MdMADS128 | MDP0000925348 |                 |
| MdMADS066 | MdMADS72  | MDP0000315764 |                 |
| MdMADS067 | MdMADS60  | MDP0000193953 |                 |
| MdMADS068 | MdMADS62  | MDP0000192806 |                 |
| MdMADS069 | MdMADS120 | MDP0000296123 |                 |
| MdMADS070 | MdMADS9   | MDP0000289858 | AJ001682        |
| MdMADS071 | MdMADS30  | MDP0000605482 |                 |
| MdMADS072 | MdMADS37  | MDP0000132738 |                 |
| MdMADS073 | MdMADS51  | MDP0000143531 |                 |
| MdMADS074 | MdMADS41  | MDP0000223851 |                 |
| MdMADS075 | MdMADS14  | MDP0000324259 | AJ251117        |
| MdMADS076 | MdMADS95  | MDP0000611204 |                 |
| MdMADS077 | MdMADS91  | MDP0000291070 |                 |
| MdMADS078 | MdMADS34  | MDP0000518032 |                 |
| MdMADS079 | MdMADS136 | MDP0000254632 |                 |
| MdMADS080 |           | MDP0000123808 |                 |
| MdMADS081 | MdMADS17  | MDP0000270062 | HM122600        |
| MdMADS082 | MdMADS67  | MDP0000248130 |                 |
| MdMADS083 | MdMADS69  | MDP0000205637 |                 |
| MdMADS084 | MdMADS89  | MDP0000274606 |                 |
| MdMADS085 | MdMADS15  | MDP0000324166 | AJ251118        |
| MdMADS086 | MdMADS61  | MDP0000316609 |                 |
| MdMADS087 | MdMADS46  | MDP0000311107 |                 |
| MdMADS089 | MdMADS96  | MDP0000314058 |                 |
| MdMADS088 | MdMADS50  | MDP0000233948 |                 |
| MdMADS090 | MdMADS49  | MDP0000233843 |                 |
| MdMADS091 | MdMADS99  | MDP0000523644 |                 |
| MdMADS092 | MdMADS103 | MDP0000713024 |                 |
| MdMADS093 | MdMADS85  | MDP0000232338 |                 |
| MdMADS094 | MdMADS126 | MDP0000307605 |                 |
| MdMADS095 | MdMADS122 | MDP0000834768 |                 |
| MdMADS096 | MdMADS129 | MDP0000599449 |                 |
| MdMADS097 | MdMADS35  | MDP0000269921 |                 |
| MdMADS098 | MdMADS4   | MDP0000326906 | U78950          |
| MdMADS099 | MdMADS78  | MDP0000146231 |                 |
| MdMADS100 | MdMADS29  | MDP0000370413 |                 |
| MdMADS101 | MdMADS55  | MDP0000285581 |                 |
| MdMADS102 | MdMADS142 | MDP0000229755 |                 |
| MdMADS103 | MdMADS84  | MDP0000221590 |                 |
| MdMADS104 | MdMADS138 | MDP0000296791 |                 |
| MdMADS105 | MdMADS97  | MDP0000287530 |                 |
| MdMADS106 | MdMADS145 | MDP0000289392 |                 |
| MdMADS107 | MdMADS82  | MDP0000773068 |                 |
| MdMADS108 | MdMADS57  | MDP0000135652 |                 |
| MdMADS109 | MdMADS58  | MDP0000144516 |                 |
| MdMADS110 | MdMADS143 | MDP0000322264 |                 |
| MdMADS111 | MdMADS70  | MDP0000300752 |                 |
| MdMADS112 | MdMADS3/7 | MDP0000326390 | U78949/HM122610 |



|           |           |               |                 |
|-----------|-----------|---------------|-----------------|
| MdMADS113 | MdMADS2   | MDP0000289836 | U78948          |
| MdMADS114 | MdMADS130 | MDP0000846004 |                 |
| MdMADS115 | MdMADS56  | MDP0000234911 |                 |
| MdMADS116 | MdMADS116 | MDP0000134211 |                 |
| MdMADS117 | MdMADS118 | MDP0000186886 |                 |
| MdMADS118 | MdMADS119 | MDP0000192342 |                 |
| MdMADS119 | MdMADS141 | MDP0000303501 |                 |
| MdMADS120 | MdMADS5   | MDP0000013331 | AJ000759        |
| MdMADS121 | MdMADS27  | MDP0000280009 |                 |
| MdMADS122 | MdMADS81  | MDP0000147667 |                 |
| MdMADS123 | MdMADS28  | MDP0000220008 |                 |
| MdMADS124 | MdMADS42  | MDP0000255146 |                 |
| MdMADS125 | MdMADS52  | MDP0000322567 |                 |
| MdMADS126 | MdMADS45  | MDP0000277582 |                 |
| MdMADS127 | MdMADS1/8 | MDP0000366022 | U78947/AJ001681 |
| MdMADS128 | MdMADS25  | MDP0000242009 |                 |
| MdMADS129 | MdMADS104 | MDP0000315688 |                 |
| MdMADS130 | MdMADS114 | MDP0000128016 |                 |
| MdMADS131 | MdMADS111 | MDP0000138447 |                 |
| MdMADS132 | MdMADS93  | MDP0000159062 |                 |
| MdMADS133 | MdMADS94  | MDP0000168914 |                 |
| MdMADS134 | MdMADS117 | MDP0000185853 |                 |
| MdMADS135 | MdMADS108 | MDP0000186558 |                 |
| MdMADS136 | MdMADS109 | MDP0000218227 |                 |
| MdMADS137 | MdMADS140 | MDP0000251651 |                 |
| MdMADS138 | MdMADS10  | MDP0000268317 | AJ000762        |
| MdMADS139 | MdMADS113 | MDP0000278738 |                 |
| MdMADS140 | MdMADS100 | MDP0000314422 |                 |
| MdMADS141 | MdMADS98  | MDP0000434703 |                 |
| MdMADS142 | MdMADS123 | MDP0000753870 |                 |
|           | MdMADS19  | MDP0000120269 | HM122602        |
|           | MdMADS146 | MDP0000167796 |                 |
|           | MdMADS115 | MDP0000190058 |                 |
|           | MdMADS127 | MDP0000228437 |                 |
|           | MdMADS16  | MDP0000233948 | HM122599        |
|           | MdMADS66  | MDP0000270062 |                 |
|           | MdMADS12  | MDP0000278897 | AJ320187        |
|           | MdMADS74  | MDP0000904420 |                 |
|           | MdMADS18  | MDP0000936232 | HM122601        |

|                                                                                     |                                                              |
|-------------------------------------------------------------------------------------|--------------------------------------------------------------|
|  | Reported in present study only                               |
|  | Reported by Tian et al. only                                 |
|  | Reported by Tian et al. only, however contains only K domain |
|  | Same MdMADSs reported twice by Tian et al.                   |

**Supplementary Table S3.** The sample abbreviation and their collection intervals.

| <b>Developmental stages/Tissues</b> | <b>Sample code</b> | <b>Collection intervals</b> |
|-------------------------------------|--------------------|-----------------------------|
| <b>Apical bud</b>                   | AP1                | 0 day                       |
|                                     | AP2                | 38 days                     |
|                                     | AP3                | 70 days                     |
| <b>Spur bud</b>                     | SP1                | 0 day                       |
|                                     | SP2                | 38 days                     |
|                                     | SP3                | 70 days                     |
|                                     | SP4                | 104 days                    |
|                                     | SP5                | 126 days                    |
| <b>Bud break</b>                    | GT (Green tip)     | 0 day                       |
| <b>Flower</b>                       | TC (Tight cluster) | 10 days                     |
|                                     | IP (Initial pink)  | 15 days                     |
|                                     | FP (Full pink)     | 26 days                     |
|                                     | FF (Bloom)         | 30 days                     |
|                                     | PF (Petal fall)    | 39 days                     |
| <b>Fruit</b>                        | FS1                | 13 DAP                      |
|                                     | FS2                | 28 DAP                      |
|                                     | FS3                | 44 DAP                      |
|                                     | FS4                | 83 DAP                      |
|                                     | FS5                | 102 DAP                     |
|                                     | FS6                | 132 DAP                     |
|                                     | FS7                | 161 DAP                     |

**Supplementary Table S4.** List of low temperature responsive elements in 1.5Kb upstream promoter regions of MdDAMs.

| <b>DAM genes</b> | <b>Element name</b>   | <b>Up-stream transcription start Site</b> | <b>Strand</b> | <b>Motif sequence</b> | <b>PLACE motif ID</b> |
|------------------|-----------------------|-------------------------------------------|---------------|-----------------------|-----------------------|
| <i>MdMADS024</i> | LTRECOREATCOR15       | 125                                       | (+)           | CCGAC                 | S000153               |
| <i>MdMADS061</i> | LTRECOREATCOR15       | 1167                                      | (+)           | CCGAC                 | S000153               |
| <i>MdMADS063</i> | LTRECOREATCOR15       | 278                                       | (+)           | CCGAC                 | S000153               |
|                  | LTRECOREATCOR15       | 308                                       | (+)           | CCGAC                 | S000153               |
| <i>MdMADS088</i> | No LTRE element found |                                           |               |                       |                       |
| <i>MdMADS124</i> | No LTRE element found |                                           |               |                       |                       |
| <i>MdMADS125</i> | CBFHV                 | 745                                       | (+)           | RYCGAC                | S000497               |
|                  | CBFHV                 | 833                                       | (+)           | RYCGAC                | S000497               |
|                  | CBFHV                 | 540                                       | (+)           | RYCGAC                | S000497               |
|                  | LTREATLTI78           | 833                                       | (+)           | ACCGACA               | S0157                 |
|                  | LTRECOREATCOR15       | 266                                       | (+)           | CCGAC                 | S000153               |
|                  | LTRECOREATCOR15       | 541                                       | (+)           | CCGAC                 | S000153               |
|                  | LTRECOREATCOR15       | 834                                       | (+)           | CCGAC                 | S000153               |

**Supplementary Table S5.** List of DNA binding site sequence for MdMADS proteins identified in apple.

| <b>Reproductive phase SVP binding motifs</b> | <b>Vegetative phase SVP binding motif</b> |
|----------------------------------------------|-------------------------------------------|
| ccaaaaaagg                                   | ccaaaaaagg                                |
| ccaaaaatgg                                   | ccaaaaatgg                                |
| ccaaaattgg                                   | ccaaaattgg                                |
| ccaaattagg                                   | ccaaatagg                                 |
| ccaaatttgg                                   | ccaaatttgg                                |
| ccaatattgg                                   | ccaatattgg                                |
| ccaatttgg                                    | ccaattagg                                 |
| ccataaatgg                                   | ccaattagg                                 |
| ccattaaagg                                   | ccataattgg                                |
| ccattaatgg                                   | ccatattagg                                |
| ccatttttag                                   | ccatatttgg                                |
| ccatttttgg                                   | ccattattgg                                |
| cctaaaaagg                                   | ccattttagg                                |
| cctaattagg                                   | cctaaaaagg                                |
| cctataatgg                                   | cctaaattgg                                |
| cctattaagg                                   | cctaatttgg                                |
| ccttaaaagg                                   | cctataatgg                                |
| ccttattagg                                   | cctattaagg                                |
| ccttatttgg                                   | ccttaaaagg                                |
| cctttatgg                                    | ccttaatagg                                |
| ccttttagg                                    | ccttaattgg                                |
| cctttttgg                                    | cctttaatgg                                |
|                                              | ccttttttgg                                |

**Supplementary Table S6.** List of hub proteins and their interacting partners in Arabidopsis identified through protein-protein interaction network and their orthologs in apple.

| At hub gene      | At hub gene interactor | Putative apple hub gene (At ortholog) | Putative apple hub gene interactor (At ortholog) |
|------------------|------------------------|---------------------------------------|--------------------------------------------------|
| <b>AT1G66410</b> |                        | <b>MDP0000344216</b>                  |                                                  |
|                  | AT5G49450              |                                       | MDP0000335904                                    |
|                  | AT1G76650              |                                       | MDP0000301599                                    |
|                  | AT1G09840              |                                       | MDP0000168962                                    |
|                  | AT1G02920              |                                       | MDP0000212253                                    |
|                  | AT1G69270              |                                       | MDP0000224837                                    |
|                  | AT4G02640              |                                       | MDP0000945064                                    |
|                  | AT4G23650              |                                       | MDP0000261109                                    |
|                  | AT5G60910              |                                       | MDP0000173549                                    |
|                  | AT1G48090              |                                       | MDP0000242105                                    |
|                  | AT4G04570              |                                       | MDP0000306767                                    |
|                  | AT1G32250              |                                       | MDP0000499214                                    |
|                  | AT4G18630              |                                       | MDP0000186456                                    |
|                  | AT4G18950              |                                       | MDP0000892891                                    |
|                  | AT5G17470              |                                       | MDP0000892891                                    |
|                  | AT3G61650              |                                       | MDP0000743939                                    |
| <b>AT5G23290</b> |                        | <b>MDP0000218129</b>                  |                                                  |
|                  | AT5G19820              |                                       | MDP0000770853                                    |
|                  | AT3G12810              |                                       | MDP0000129826                                    |
|                  | AT1G54960              |                                       | MDP0000861495                                    |
|                  | AT5G55310              |                                       | MDP0000893502                                    |
|                  | AT4G29810              |                                       | MDP0000251096                                    |
|                  | AT2G18990              |                                       | MDP0000248767                                    |
|                  | AT1G14690              |                                       | MDP0000123927                                    |
|                  | AT4G14960              |                                       | MDP0000829998                                    |
|                  | AT2G36200              |                                       | MDP0000158090                                    |
|                  | AT3G61650              |                                       | MDP0000743939                                    |
|                  | AT4G39050              |                                       | MDP0000162639                                    |
|                  | AT3G47690              |                                       | MDP0000317112                                    |
| <b>AT5G19820</b> |                        | <b>MDP0000770853</b>                  |                                                  |
|                  | AT3G16950              |                                       | MDP0000310711                                    |
|                  | AT4G14960              |                                       | MDP0000829998                                    |
|                  | AT1G07660              |                                       | MDP0000923289                                    |
|                  | AT3G05960              |                                       | MDP0000529326                                    |
|                  | AT3G51260              |                                       | MDP0000326966                                    |
|                  | AT5G23290              |                                       | MDP0000218129                                    |
|                  | AT3G19980              |                                       | MDP0000172963                                    |
|                  | AT1G70490              |                                       | MDP0000788110                                    |
|                  | AT5G02530              |                                       | MDP0000142206                                    |
|                  | AT4G34910              |                                       | MDP0000308104                                    |
|                  | AT3G01280              |                                       | MDP0000301544                                    |
| <b>AT3G19980</b> |                        | <b>MDP0000172963</b>                  |                                                  |
|                  | AT3G16950              |                                       | MDP0000310711                                    |
|                  | AT3G05960              |                                       | MDP0000529326                                    |
|                  | AT5G19820              |                                       | MDP0000770853                                    |
|                  | AT1G09840              |                                       | MDP0000168962                                    |
|                  | AT4G21800              |                                       | MDP0000201702                                    |
|                  | AT4G05020              |                                       | MDP0000120459                                    |
|                  | AT5G55260              |                                       | MDP0000266741                                    |
|                  | AT3G01280              |                                       | MDP0000301544                                    |
| <b>AT4G14960</b> |                        | <b>MDP0000829998</b>                  |                                                  |
|                  | AT5G23670              |                                       | MDP0000251269                                    |
|                  | AT5G02880              |                                       | MDP0000699611                                    |
|                  | AT5G59840              |                                       | MDP0000315756                                    |
|                  | AT5G19820              |                                       | MDP0000770853                                    |
|                  | AT5G63860              |                                       | MDP0000794968                                    |
|                  | AT5G23290              |                                       | MDP0000218129                                    |
|                  | AT3G61650              |                                       | MDP0000743939                                    |
|                  | AT5G07760              |                                       | MDP0000311544                                    |

**Supplementary Table S7.** Over-represented biological process and molecular function gene ontology terms associated with reproductive phase network proteins.

| Biological process |                                                                                                                                                                                                                                                                                                                                                                   | Molecular function |                                                                                                                                                                                                                                                                                                                                                                   |
|--------------------|-------------------------------------------------------------------------------------------------------------------------------------------------------------------------------------------------------------------------------------------------------------------------------------------------------------------------------------------------------------------|--------------------|-------------------------------------------------------------------------------------------------------------------------------------------------------------------------------------------------------------------------------------------------------------------------------------------------------------------------------------------------------------------|
|                    | Post-embryonic development (p value; 0.00171)                                                                                                                                                                                                                                                                                                                     |                    | Protein kinase activity (p value; 0.0112)                                                                                                                                                                                                                                                                                                                         |
| At ID              | Go terms                                                                                                                                                                                                                                                                                                                                                          | At ID              | Go terms                                                                                                                                                                                                                                                                                                                                                          |
| AT3G19980          | GO:0005737 cytoplasm<br>GO:0000159 protein phosphatase type 2A complex<br>GO:0005634 nucleus<br>GO:0009910 negative regulation of flower development<br>GO:0004722 protein serine/threonine phosphatase activity<br>GO:0004674 protein serine/threonine kinase activity<br>GO:0009793 embryonic development ending in seed dormancy<br>GO:0005515 protein binding | AT3G19980          | GO:0005737 cytoplasm<br>GO:0000159 protein phosphatase type 2A complex<br>GO:0005634 nucleus<br>GO:0009910 negative regulation of flower development<br>GO:0004722 protein serine/threonine phosphatase activity<br>GO:0004674 protein serine/threonine kinase activity<br>GO:0009793 embryonic development ending in seed dormancy<br>GO:0005515 protein binding |
| AT5G60910          | GO:0003700 transcription factor activity<br>GO:0009911 positive regulation of flower development<br>GO:0010154 fruit development                                                                                                                                                                                                                                  | AT1G69270          | GO:0004702 receptor signaling protein serine/threonine kinase activity<br>GO:0009738 abscisic acid mediated signaling pathway<br>GO:0005515 protein binding<br>GO:0005886 plasma membrane                                                                                                                                                                         |
| AT3G12810          | GO:0048451 petal formation<br>GO:0003677 DNA binding<br>GO:0004386 helicase activity<br>GO:0042742 defense response to bacterium<br>GO:0016514 SWI/SNF complex<br>GO:0005524 ATP binding                                                                                                                                                                          | AT4G29810          | GO:0005737 cytoplasm<br>GO:0009814 defense response, incompatible interaction<br>GO:0009631 cold acclimation<br>GO:0000165 MAPKKK cascade<br>GO:0009651 response to salt stress<br>GO:0004708 MAP kinase kinase activity                                                                                                                                          |
| AT3G61650          | GO:0009553 embryo sac development<br>GO:0000914 phragmoplast assembly<br>GO:0048768 root hair cell tip growth<br>GO:0005739 mitochondrion<br>GO:0005198 structural molecule activity<br>GO:0048366 leaf development<br>GO:0005874 microtubule<br>GO:0010103 stomatal complex morphogenesis<br>GO:0051641 cellular localization                                    | AT4G18950          | GO:0005737 cytoplasm<br>GO:0009966 regulation of signal transduction<br>GO:0005634 nucleus<br>GO:0004712 protein serine/threonine/tyrosine kinase activity<br>GO:0006468 protein amino acid phosphorylation                                                                                                                                                       |
| AT5G49450          | GO:0003700 transcription factor activity<br>GO:0006355 regulation of transcription, DNA-dependent<br>GO:0046982 protein heterodimerization activity<br>GO:0009901 anther dehiscence                                                                                                                                                                               | AT1G54960          | GO:0000910 cytokinesis<br>GO:0004709 MAP kinase kinase activity                                                                                                                                                                                                                                                                                                   |
| AT5G23670          | GO:0005783 endoplasmic reticulum<br>GO:0009555 pollen development<br>GO:0016020 membrane<br>GO:0004758 serine C-palmitoyltransferase activity<br>GO:0005515 protein binding<br>GO:0046512 sphingosine biosynthetic process<br>GO:0009640 photomorphogenesis                                                                                                       | AT1G09840          | GO:0004672 protein kinase activity                                                                                                                                                                                                                                                                                                                                |
| AT5G19820          | GO:0016829 lyase activity<br>GO:0030089 phycobilisome<br>GO:0009793 embryonic development ending in seed dormancy                                                                                                                                                                                                                                                 | AT4G23650          | GO:0006468 protein amino acid phosphorylation<br>GO:0004683 calmodulin-dependent protein kinase activity<br>GO:0009738 abscisic acid mediated signaling pathway<br>GO:0010119 regulation of stomatal movement<br>GO:0010359 regulation of anion channel activity<br>GO:0005886 plasma membrane                                                                    |

**Supplementary Table S8.** List of primer sequence of randomly selected 10 MdMADS genes.

| <b>Sr. No</b> | <b>Gene name/clade</b> | <b>MdMADS ID</b> | <b>Primer sequence</b>              |
|---------------|------------------------|------------------|-------------------------------------|
| 1             | DAM                    | <i>MdMADS125</i> | Fwd 5'-GAGTGAGGTTATGGCACTTGAGAA-3'  |
|               |                        |                  | Rev 5'-GATGGCCTCTGGTCCAATATCTC-3'   |
| 2             | DAM                    | <i>MdMADS024</i> | Fwd 5'-CCAGCTCTAGTATGAAGGAAA-3'     |
|               |                        |                  | Rev 5'-TCTCCACTAGCTGTA ACTCAA-3'    |
| 3             | TM8                    | <i>MdMADS111</i> | Fwd 5'-CGACATAACTAGGACCATTTTC-3'    |
|               |                        |                  | Rev 5'-CCTCCAATACTCCATTGTTCT-3'     |
| 4             | AP3/PI                 | <i>MdMADS044</i> | Fwd 5'-TGGAGGAAAGAAGAGGAAACATG-3'   |
|               |                        |                  | Rev 5'-TCTCCCTCATTGTCCACATAACAA-3'  |
| 5             | SEP                    | <i>MdMADS123</i> | Fwd 5'-TGTCGCTGAAGCAGATCAGATC-3'    |
|               |                        |                  | Rev 5'-CTTCGTTTAGCACGTGTTTCATTTC-3' |
| 6             | MIKCC-II               | <i>MdMADS126</i> | Fwd 5'-GGCAACAACATTTAATCCATCGA-3'   |
|               |                        |                  | Rev 5'-GAACTCCCACCCGTCATAACC-3'     |
| 7             | FLC-like               | <i>MdMADS135</i> | Fwd 5'-GTCTCAGATTGGGTGCATTGT-3'     |
|               |                        |                  | Rev 5'-GGCTAACTTAAATCTGGTGCAACA-3'  |
| 8             | SOC1                   | <i>MdMADS014</i> | Fwd 5'-GGGAACCATAGAGCGTTATCAGAA-3'  |
|               |                        |                  | Rev 5'-TTCAGATGCTGCATATTTGTTCA-3'   |
| 9             | AP1                    | <i>MdMADS050</i> | Fwd 5'-CTTCTCTACCAAAGGCAAGCTTTT-3'  |
|               |                        |                  | Rev 5'-CACCAGCACTATACCCAGTCTGTCT-3' |
| 10            | AGL15                  | <i>MdMADS051</i> | Fwd 5'-AGCTTCGATGTTTGTTCACAA-3'     |
|               |                        |                  | Rev 5'-GGTTTACAAGGATTTGGTTTCTC-3'   |
